# Supplementary material
Source: PubMed Central journal article supplement (PMC3536272)
Supplement: EC.00250-12_zek999094016so6.pdf [file EC.00250-12_zek999094016so6.pdf]

## Nguyen et al – Supplemental material

**Table S1.** Accession numbers of *CITFA-7* orthologs

**Figure S1.** Generation of cell line TbC6ee and an anti-CITFA-6 immune serum.

**Figure S2.** *CITFA-7* silencing in a procyclic cell line

**Figure S3.** Quantification of CITFA-7-HA/PTP-RPB6z (RNA pol I) co-localization

**Figure S4.** Quantification of CITFA-7-HA/PTP-CITFA-2 co-localization

**Figure S5.** VSG ES promoter binding efficiency of tandem affinity-purified CITFA-2 and CITFA-7

**Figure S6.** Localization of *T. cruzi* CITFA-7-HA

### Supplemental References

**Table S1. Accession numbers of *CITFA-7* orthologs**

| Species                        | Abbreviation | Accession number       |
|--------------------------------|--------------|------------------------|
| <i>Trypanosoma brucei</i>      | Tb           | Tb927.7.2600           |
| <i>Trypanosoma congolense</i>  | Tco          | TcIL3000.7.1910        |
| <i>Trypanosoma vivax</i>       | Tv           | TvY486_0702470         |
| <i>Trypanosoma cruzi</i>       | Tc           | Tc00.1047053506859.100 |
| <i>Leishmania major</i>        | Lm           | LmjF.22.0680           |
| <i>Leishmania infantum</i>     | Li           | LinJ.22.0550           |
| <i>Leishmania braziliensis</i> | Lb           | LbrM.22.0610           |

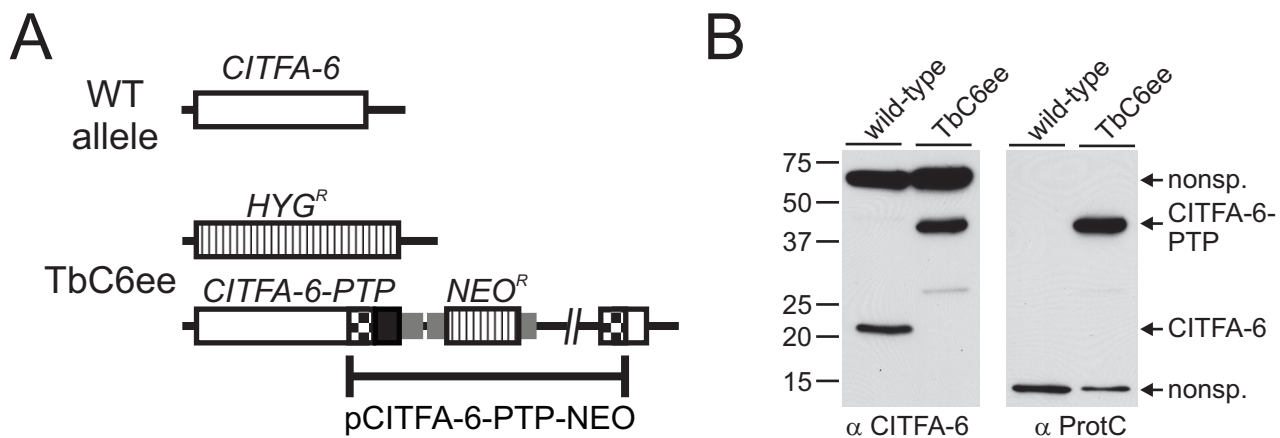

**FIG. S1.** Generation of cell line TbC6ee and an anti-CITFA-6 immune serum. (A) Schematic depiction of a CITFA-6 wild-type (WT) allele and of modified alleles in cell line TbC6ee which exclusively expresses CITFA-6-PTP and no untagged CITFA-6. The CITFA-6 coding region, *HYG<sup>R</sup>* and *NEO<sup>R</sup>* genes, and the PTP tag sequence are depicted by open boxes, striped boxes and a black box, respectively. Gene flanks for RNA processing signals are indicated by smaller grey boxes. (B) Immunoblot analysis of whole cell lysates of wild-type procyclic cells and of TbC6ee cells using a newly generated polyclonal anti-CITFA-6 immune serum ( $\alpha$  CITFA-6) and a commercially available (Roche), monoclonal anti-ProtC antibody ( $\alpha$  ProtC) that recognizes the PTP-tagged CITFA-6.

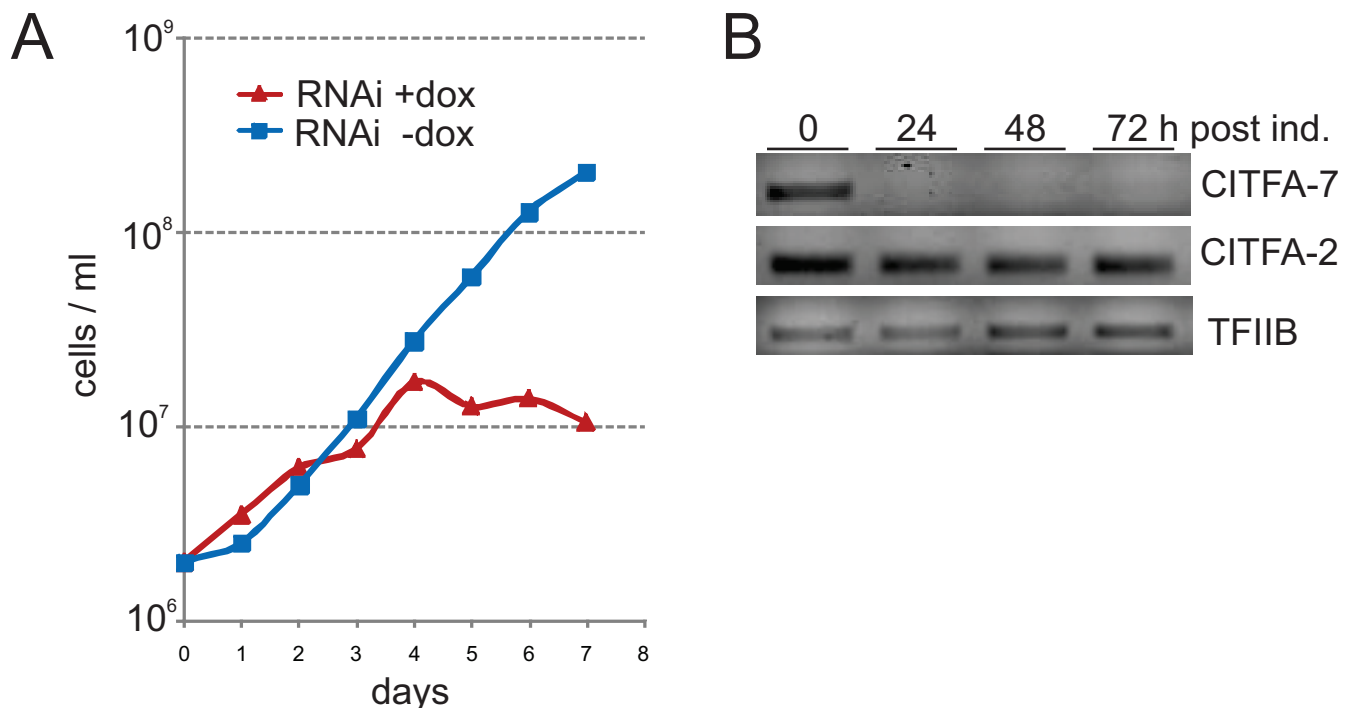

**FIG. S2.** *CITFA-7* silencing in a procyclic cell line. (A) Growth curve of a representative procyclic cell line in the absence or presence of doxycycline, the inducing compound for *CITFA-7* dsRNA synthesis. (B) Semi-quantitative reverse transcription-PCR analysis of *CITFA-7*, *CITFA-2* and, as a control, of *TFIIB* mRNA prepared from cells that were doxycycline-induced for the specified periods.

*In procyclic trypanosomes CITFA-7 silencing is lethal as in bloodstream forms (BFs) but, despite a very effective knockdown, cell death is delayed by at least 48 hours. The faster effect in BFs is most likely due to the inhibition of BF-specific VSG expression which was shown to very rapidly cause cell cycle arrest in this life cycle stage (Sheader et al., 2005).*

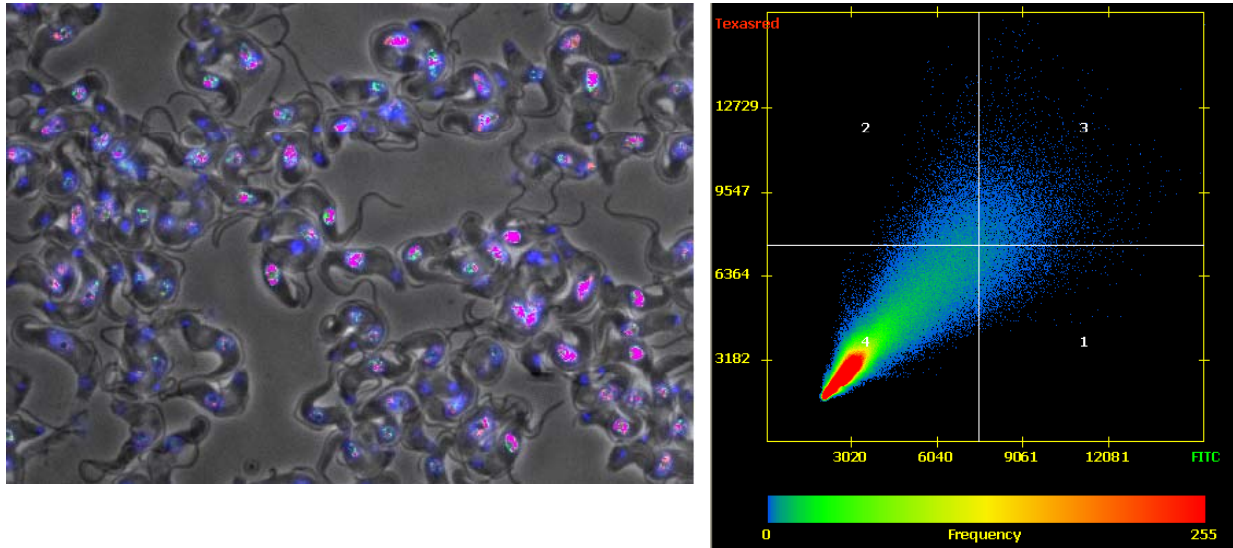

**FIG. S3.** Quantification of CITFA-7-HA/PTP-RPB6z (RNA pol I) co-localization. Left panel, representative picture of trypanosomes stained green (CITFA-7-HA), red (PTP-RPB6z), pink (co-localization) and blue (DNA, DAPI). Right panel, scatter blot showing non-co-localized CITFA-7 and RPB6z signals in quadrants 1 and 2, respectively, and high intensity co-localization signals in quadrant 3. Threshold was set to 7600, co-localization coefficient for Alexa 488 (CITFA-7-HA) was 0.48 and for Alexa 594 (PTP-RPB6z) 0.53.

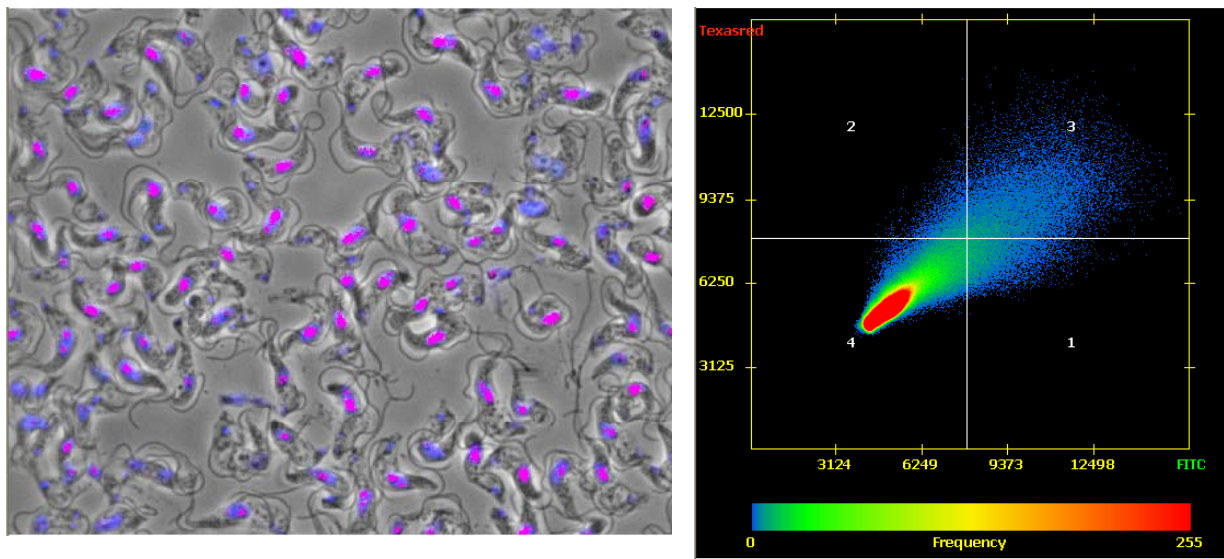

**FIG. S4.** Quantification of CITFA-7-HA/PTP-CITFA-2 co-localization. Left panel, representative picture of trypanosomes stained green (CITFA-7-HA), red (PTP-CITFA-2), pink (co-localization) and blue (DNA, DAPI). Threshold was set to 7900, co-localization coefficient for Alexa 488 (CITFA-7-HA) was 0.63 and for Alexa 594 (PTP-CITFA-2) 0.80.

**A**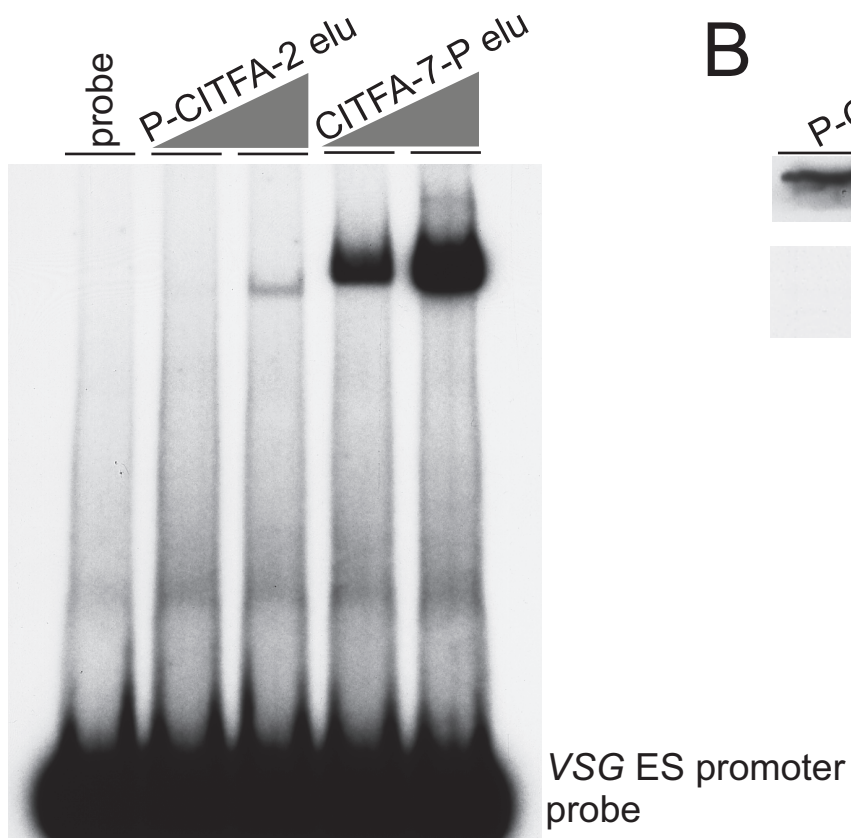**B**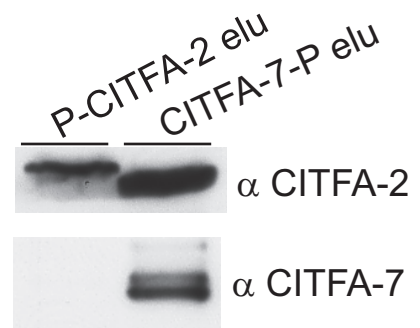

FIG. S5. VSG ES promoter binding efficiency of tandem affinity-purified CITFA-2 and CITFA-7 complexes. (A) A linear, radio-labeled VSG ES promoter fragment was shifted with final eluates of tandem affinity purifications of PTP-CITFA-2 (Brandenburg et al., 2007) and of CITFA-7-PTP (Figure 2D). For each eluate, two reactions with increasing protein amounts (1x and 4x) were carried out to demonstrate dose-dependence of DNA binding. (B) Immunoblot of the two eluates showing that they contain comparable amounts of CITFA-2 but not of CITFA-7.

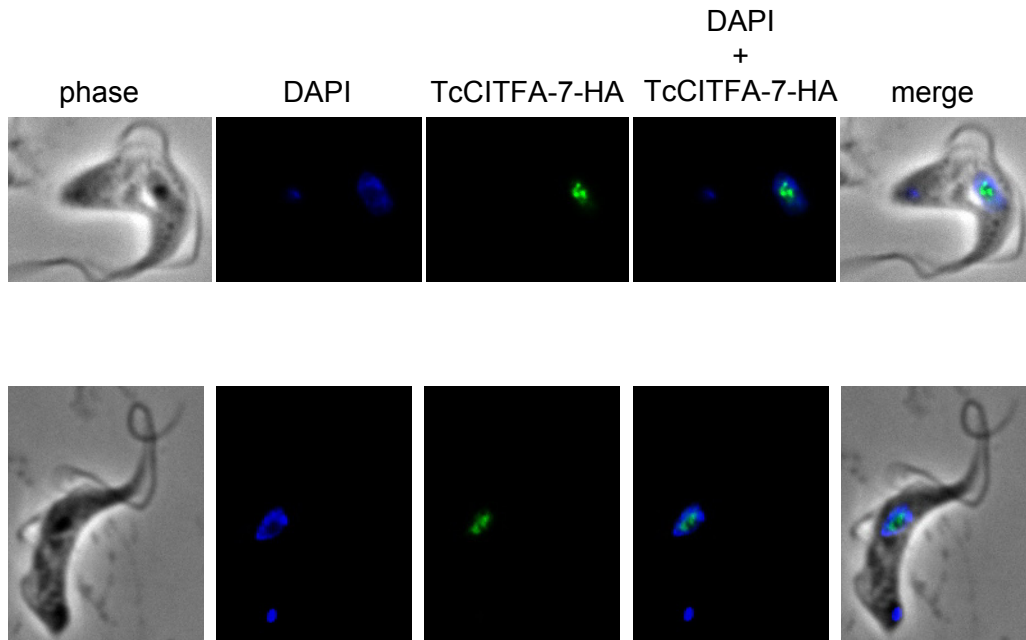

**FIG. S6.** Localization of *T. cruzi* CITFA-7-HA. Note that the nucleolus is the spherical structure of low intensity DAPI staining within the nucleus.

### Supplemental References

**Brandenburg, J., B. Schimanski, E. Nogoceke, T. N. Nguyen, J. C. Padovan, B. T. Chait, G. A. Cross, and A. Günzl.** 2007. Multifunctional class I transcription in *Trypanosoma brucei* depends on a novel protein complex. *EMBO J.* **26**:4856-4866.

**Sheader, K., S. Vaughan, J. Minchin, K. Hughes, K. Gull, and G. Rudenko.** 2005. Variant surface glycoprotein RNA interference triggers a precytokinesis cell cycle arrest in African trypanosomes. *Proc. Natl. Acad. Sci. U. S. A* **102**:8716-8721.
